# Supplementary material for: Insight into the Antifungal Mechanism of Action of Human RNase N-terminus Derived Peptides
Source: PubMed Central journal article supplement (PMC6770517; doi:10.3390/ijms20184558), 2019-09-14
Supplement: ijms-20-04558-s001.pdf [file ijms-20-04558-s001.pdf]

# Insight into the antifungal mechanism of action of human RNase N-terminus derived peptides

Salazar, Vivian A<sup>1,2\*</sup>; Arranz-Trullén, Javier<sup>1</sup>; Prats-Ejarque, Guillem<sup>1</sup>; Torrent, Marc<sup>1</sup>; Andreu David<sup>3</sup>; Pulido, David<sup>1,4</sup> and Boix, Ester<sup>1\*</sup>

<sup>1</sup>Department of Biochemistry and Molecular Biology, Faculty of Biosciences, Universitat Autònoma de Barcelona, 08193 Cerdanyola del Vallès, Spain

<sup>2</sup> Present address: Universidad de Los Andes, 111711 Bogotá, Colombia

<sup>3</sup>Department of Experimental and Health Sciences, Universitat Pompeu Fabra, Dr. Aiguader 88, 08003 Barcelona, Spain

<sup>4</sup>Present address: The Jenner Institute, University of Oxford, Old Road Campus Research Building, Oxford, OX3 7DQ UK. Oxford

## Supplementary figures and tables:

**Supplementary Table S1** Antimicrobial activities of Lys and Arg peptide variants of RN3 and RN7

| hRNase peptide | MFC <sub>100</sub> (μM) |             | IC <sub>50</sub> (μM) |
|----------------|-------------------------|-------------|-----------------------|
|                | Sabouraud               |             |                       |
|                | broth                   | PBS         |                       |
| RN3K           | 4.25 ± 0.30             | 4.25 ± 0.30 | 2.08 ± 0.27           |
| RN7R           | 2.83 ± 0.10             | 2.83 ± 0.10 | 1.62 ± 0.32           |

Minimal fungicidal concentration (MFC<sub>100</sub>) was determined as the lowest concentration of peptide that killed at least 99.9% of the initial inoculum. Values were calculated by CFU counting on plated Petri dishes as described in the methodology. *C. albicans* cultures were treated with the proteins diluted in either the Sabouraud nutrient growth media or in a phosphate saline buffer (PBS). IC<sub>50</sub> was determined using the Bactiter-Glo™ kit as detailed in the Materials and Methods section.

**Supplementary Table S2.** Minimal agglutination concentration (MAC) of hRNases' peptides.

| <b>hRNase peptide</b> | <b>MAC (<math>\mu\text{M}</math>)</b> |
|-----------------------|---------------------------------------|
| <b>RN1</b>            | $1.80 \pm 0.40$                       |
| <b>RN2</b>            | $0.40 \pm 0.10$                       |
| <b>RN3</b>            | $< 0.1$                               |
| <b>RN4</b>            | $0.40 \pm 0.10$                       |
| <b>RN5</b>            | $1.80 \pm 0.40$                       |
| <b>RN6</b>            | $0.40 \pm 0.10$                       |
| <b>RN7</b>            | $0.90 \pm 0.30$                       |
| <b>RN8</b>            | $0.90 \pm 0.20$                       |

Minimal agglutination concentration (MAC) was calculated as the lowest peptide concentration where *C. albicans* cells aggregation is visible to the naked eye. Values are averaged from three replicates of two independent experiments. Values are given as mean  $\pm$  SEM.

**Supplementary Table S3.** Gene-specific primers used for real-time RT-PCR assays in planktonic and sessile cells.

| Target gene     | Primer sequences 5'-3'                                       | Taken from | Target genes | Primer sequences 5'-3'                              | Taken from |
|-----------------|--------------------------------------------------------------|------------|--------------|-----------------------------------------------------|------------|
| <i>ACT</i>      | F' GATTTTGTCTGAACGTGGTAACAG<br>R' GGAGTTGAAAGTGGTTTGGTCAATAC | [1]        | <i>EGF1</i>  | F' TTGAGATGTTGCGGCAGGATA<br>R' ACTGGACAGACAGCAGGAC  | [2]        |
| <i>18S rRNA</i> | F' CACGACGGAGTTTCACAAGA<br>R' CGATGGAAGTTTGAGGCAAT           | [3]        | <i>ADH5</i>  | F' ACCTGCAAGGGCTCATTCTG<br>R' CGGCTCTCAACTTCTCCATA  | [2]        |
| <i>GAPDH</i>    | F' CGGTCCATCCCACAAGGA<br>R' AGTGGAAGATGGGATAATGTTACCA        | [4]        | <i>CSH1</i>  | F' CGTGAGGACGAGAGAGAAT<br>R' CGAATGGACGACACAAAACA   | [2]        |
| <i>KRE6</i>     | F' TCCAACAAGCATTATCAGCA<br>R' ATCACCAACAAACCATCGT            | [5]        | <i>GSC1</i>  | F' CCCATTCTCTAGGCACGA<br>R' ATCAACAACCACTTGCTTCG    | [2]        |
| <i>ALS3</i>     | F' GGTTATCGTCCATTIGTTGA<br>R' TTCTGTATCCAGTCCATCTT           | [2]        | <i>ZAP1</i>  | F' ATCTGTCCAGTGTTGTTTGTA<br>R' AGGTCTCTTTGAAAGTTGTG | [2]        |
| <i>CYR1</i>     | F' GTTTCCCCCACCCTCA<br>R' TTGCGGTAATGACACAACAGA              | [2]        |              |                                                     |            |

**A.**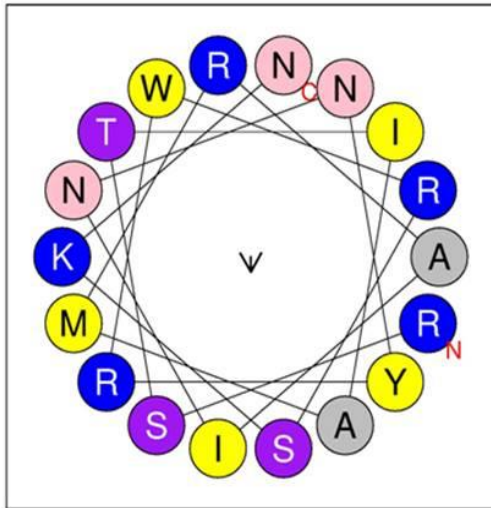**B.**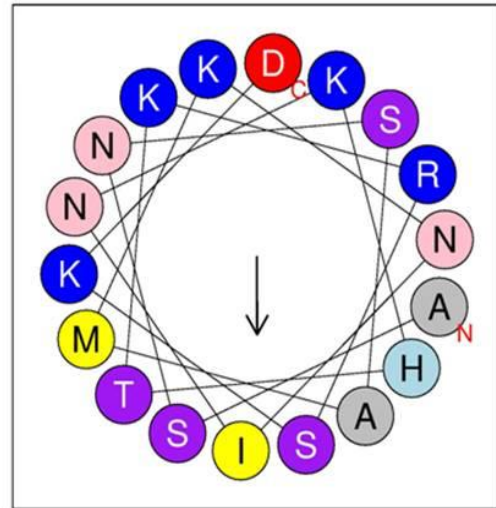

**Supplementary Figure S1: Helical wheels of RNase 3(A) and RNase 7(B) 1-45mer N-termini peptides.**

A unique alpha-helix encompassing residues 22 to 40 has been considered as predicted by RMN for RNase 3 (drawn by heliquest [6]). Cationic residues are highlighted in blue, uncharged residues in grey, polar residues in purple, nonpolar residues in yellow, polar/uncharged residues in pink and anionic residues in red. N-terminal and C-terminal domains are designated with N and C letters respectively. Taken from [7].

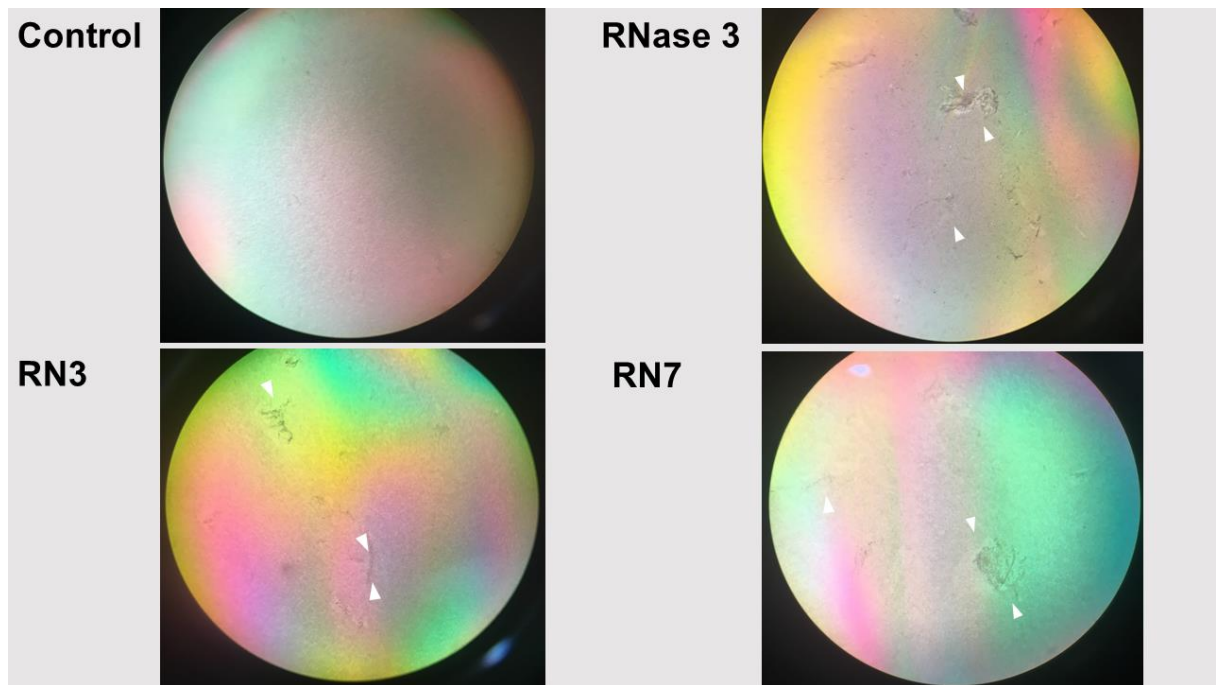

**Supplementary Figure S2:** Visualization of aggregation of *C. albicans* culture by RNase3, RN3 and RN7 peptides. Images were taken after 1 hour of incubation of *C. albicans* with 1  $\mu$ M of RNase3, RN3 and RN7, as detailed in the Materials and Methods section, using a 50 $\times$  stereoscope microscope.

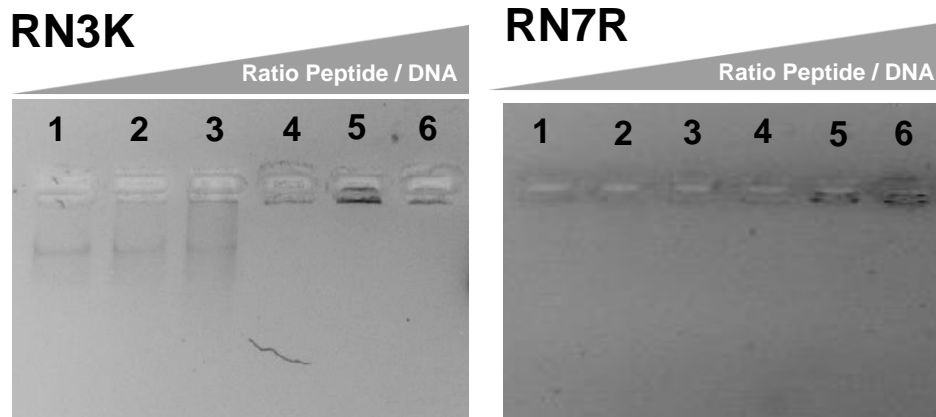

**Supplementary Figure S3: Analysis of DNA binding activity of RN3 and RN7 substitute analogs using a gel retardation assay.** The affinity to bind DNA was assayed by the inhibitory effect of the peptides on migration of DNA. Different amounts of the peptides were incubated with 200 ng of pET 28 plasmid DNA in 10  $\mu$ L of binding buffer at room temperature during 20 min and subjected to electrophoresis on a 1.0% agarose gel. The first lane corresponds to negative control without peptide and the following lanes correspond to ratios peptide/DNA 2.5:1, 5:1, 10:1, 20:1 and 50:1 respectively.

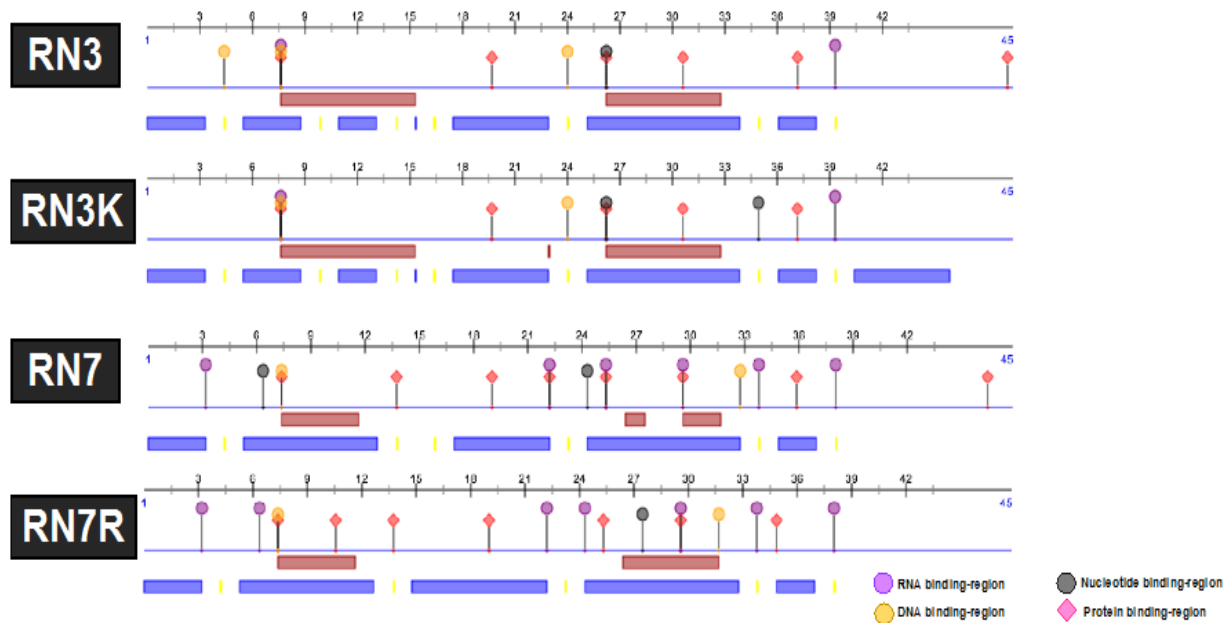

| PEPTIDE<br>(Secondary structure) | HELIX            | STRAND | LOOP  |
|----------------------------------|------------------|--------|-------|
|                                  | % in the protein |        |       |
| <b>RN1</b>                       | 37.50            | 4.17   | 58.33 |
| <b>RN2</b>                       | 44.44            | 4.44   | 51.11 |
| <b>RN3</b>                       | 44.44            | 0.0    | 55.56 |
| <b>RN3K</b>                      | 44.44            | 0.0    | 55.56 |
| <b>RN4</b>                       | 40.43            | 4.26   | 55.32 |
| <b>RN5</b>                       | 42.55            | 4.26   | 53.19 |
| <b>RN6</b>                       | 44.44            | 0.0    | 55.56 |
| <b>RN7</b>                       | 44.4             | 0.0    | 55.56 |
| <b>RN7R</b>                      | 42.22            | 0.0    | 57.78 |
| <b>RN8</b>                       | 44.44            | 0.0    | 55.56 |

**Supplementary Figure S4: Secondary structure prediction of hRNase derived peptides (RN1-8) and K/R variants.** The alpha-helix structure are represented by red horizontal line. The RNA or DNA binding residues are showed by circles or diamond forms. Percentage of helix, strand or loop structures are displayed in the embedded table. The figure was created using the online PredictProtein server: <https://www.predictprotein.org>.

Sample Information

Sample ID: RNase1  
 Tray#: 1  
 Vial#: 31  
 Injection Volume: 60 uL  
 Method Filename: 5a60en15 '.lcm

Purity: 99 %

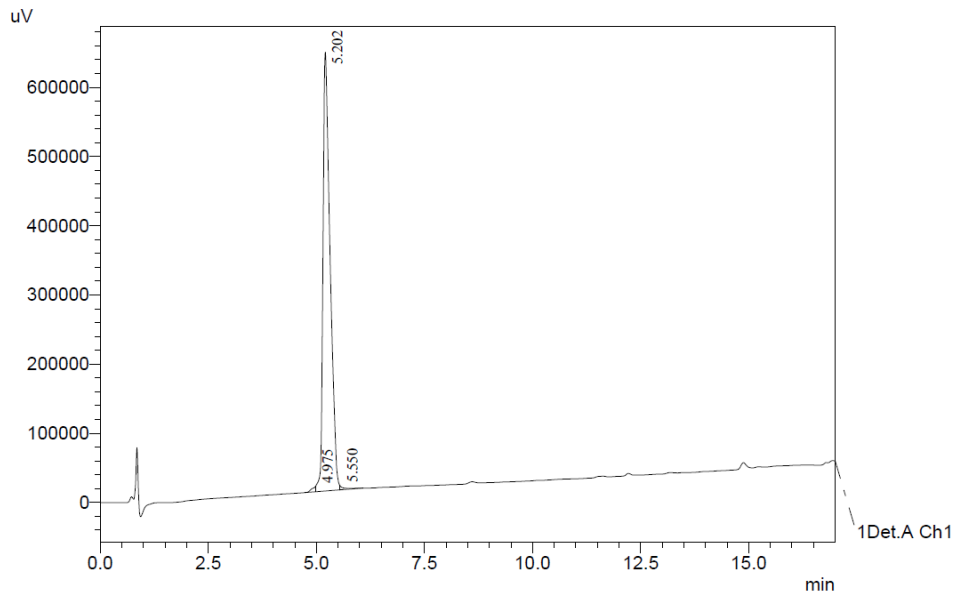

1 Det.A Ch1 / 220nm

PeakTable

Detector A Ch1 220nm

| Peak#        | Ret. Time | Area           | Height        | Area %         |
|--------------|-----------|----------------|---------------|----------------|
| 1            | 4.975     | 47048          | 7460          | 0.643          |
| 2            | 5.202     | 7229668        | 634292        | 98.774         |
| 3            | 5.550     | 42708          | 5638          | 0.583          |
| <b>Total</b> |           | <b>7319423</b> | <b>647390</b> | <b>100.000</b> |



Sample Information

Sample ID: RNase2  
 Tray#: 1  
 Vail#: 31  
 Injection Volume: 10 uL  
 Method Filename: 20a60en15.lcm

Purity: 94 %

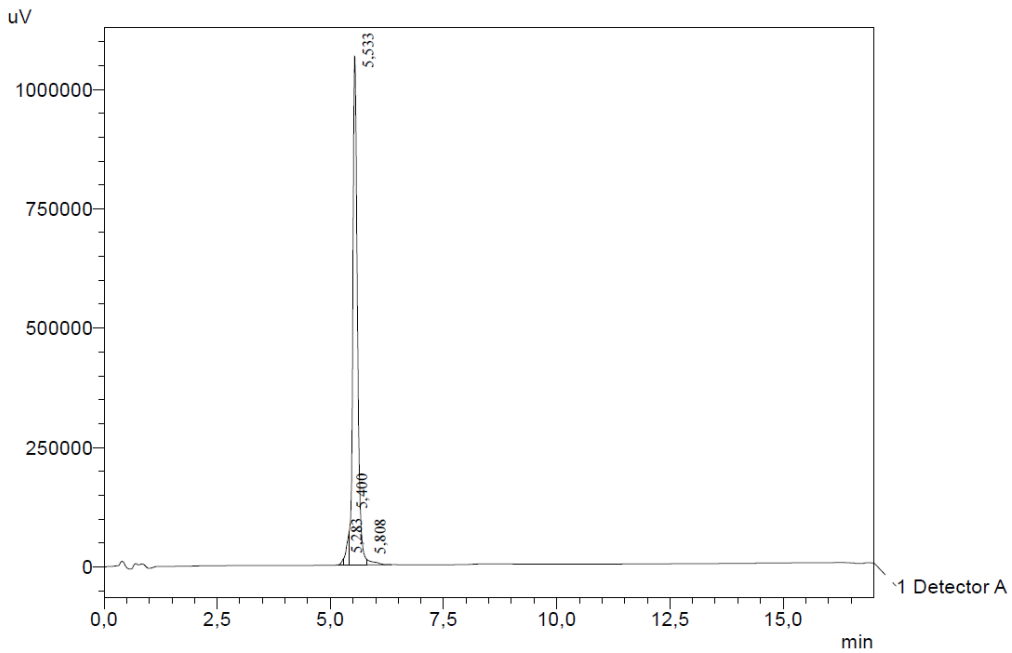

1 Detector A / 220nm

PeakTable

Detector A 220nm

| Peak# | Ret. Time | Area    | Height  | Area %  |
|-------|-----------|---------|---------|---------|
| 1     | 5.283     | 40416   | 12570   | 0.502   |
| 2     | 5.400     | 260866  | 60736   | 3.241   |
| 3     | 5.533     | 7630691 | 1066270 | 94.790  |
| 4     | 5.808     | 118111  | 10881   | 1.467   |
| Total |           | 8050085 | 1150457 | 100.000 |

Sample Information

Sample ID: RNase3  
 Tray#: 1  
 Vial#: 31  
 Injection Volume: 10 uL  
 Method Filename: 20a60en15.lcm

Purity: 98 %

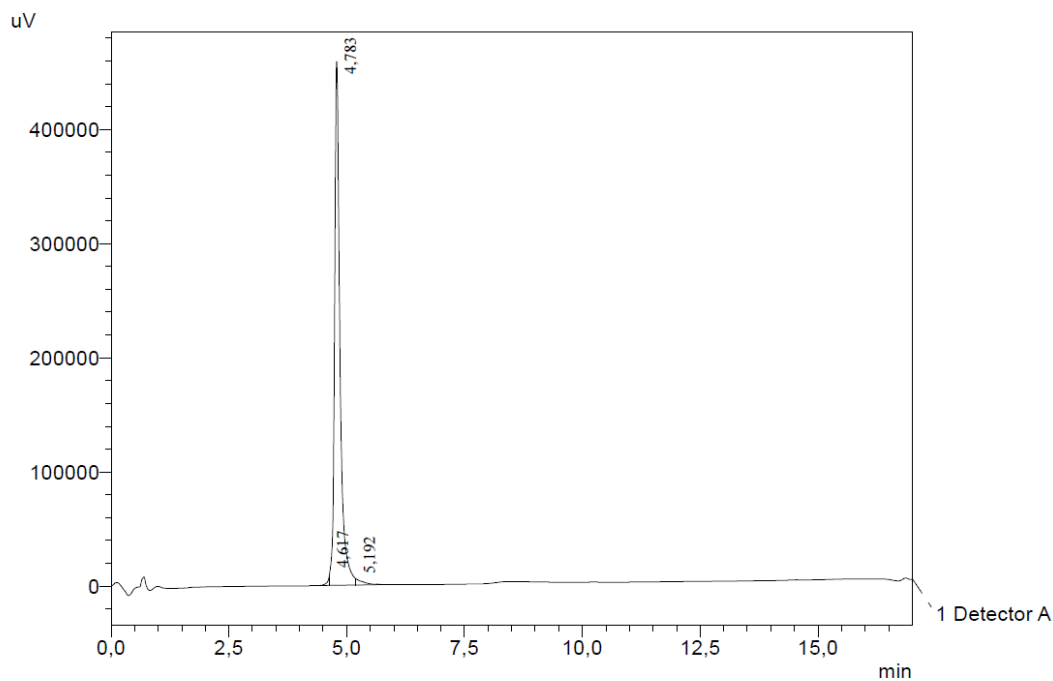

1 Detector A / 220nm

PeakTable

Detector A 220nm

| Peak# | Ret. Time | Area    | Height | Area %  |
|-------|-----------|---------|--------|---------|
| 1     | 4.617     | 20160   | 5591   | 0.539   |
| 2     | 4.783     | 3660667 | 458525 | 97.867  |
| 3     | 5.192     | 59625   | 5612   | 1.594   |
| Total |           | 3740453 | 469728 | 100.000 |

Sample Information

Sample ID: 3K  
 Tray#: 1  
 Val#: 31  
 Injection Volume: 10 uL  
 Method Filename: 10a60en15.lcm

Purity: 90 %

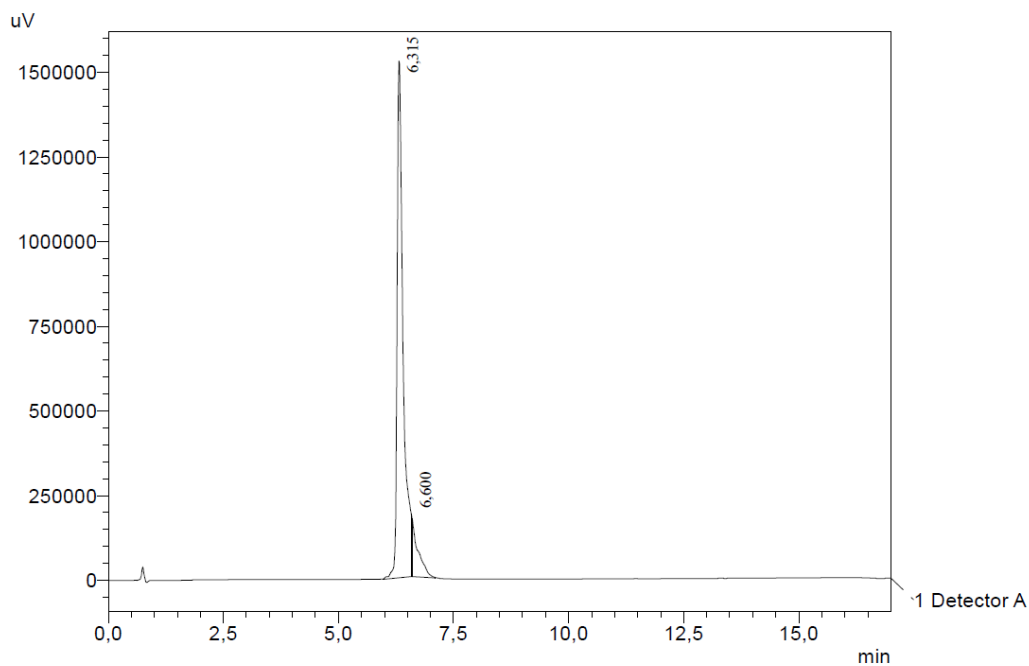

1 Detector A / 220nm

PeakTable

Detector A 220nm

| Peak# | Ret. Time | Area     | Height  | Area %  |
|-------|-----------|----------|---------|---------|
| 1     | 6.315     | 13927245 | 1527024 | 90.500  |
| 2     | 6.600     | 1461988  | 171094  | 9.500   |
| Total |           | 15389233 | 1698118 | 100.000 |

Sample Information

Sample ID: RNase4  
 Tray#: 1  
 Vial#: 31  
 Injection Volume: 15 uL  
 Method Filename: 15a50en15.lcm

Purity: 94 %

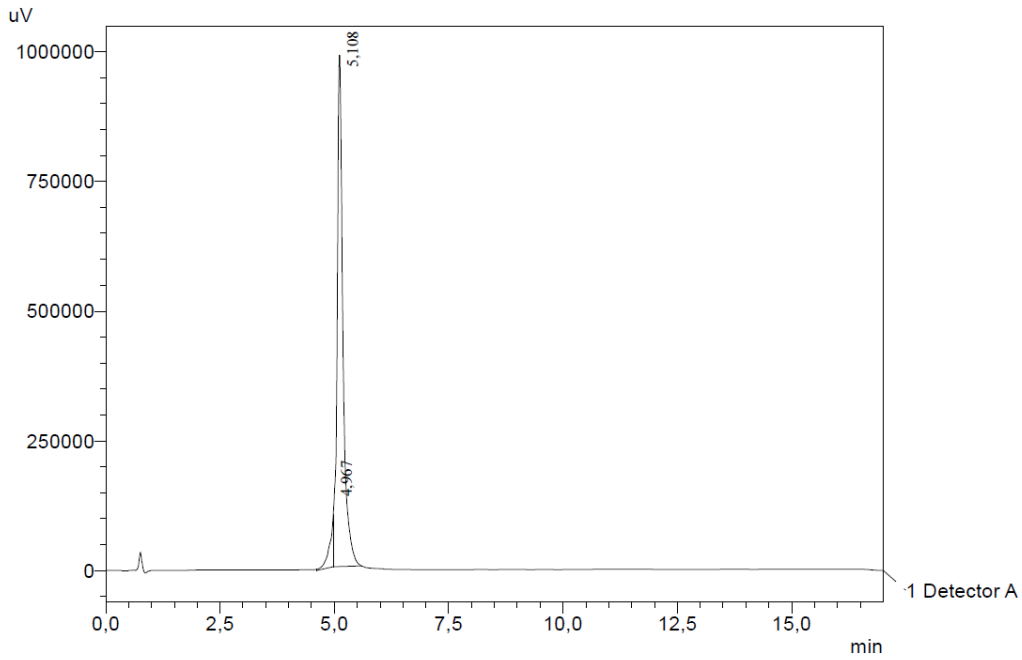

1 Detector A / 220nm

PeakTable

| Peak# | Ret. Time | Area    | Height  | Area %  |
|-------|-----------|---------|---------|---------|
| 1     | 4.967     | 550487  | 87732   | 5.940   |
| 2     | 5.108     | 8716228 | 986079  | 94.060  |
| Total |           | 9266715 | 1073810 | 100.000 |

Sample Information

Sample ID: RNase5  
 Tray#: 1  
 Vial#: 31  
 Injection Volume: 15 uL  
 Method Filename: 10a50en15.lcm

Purity: 93 %

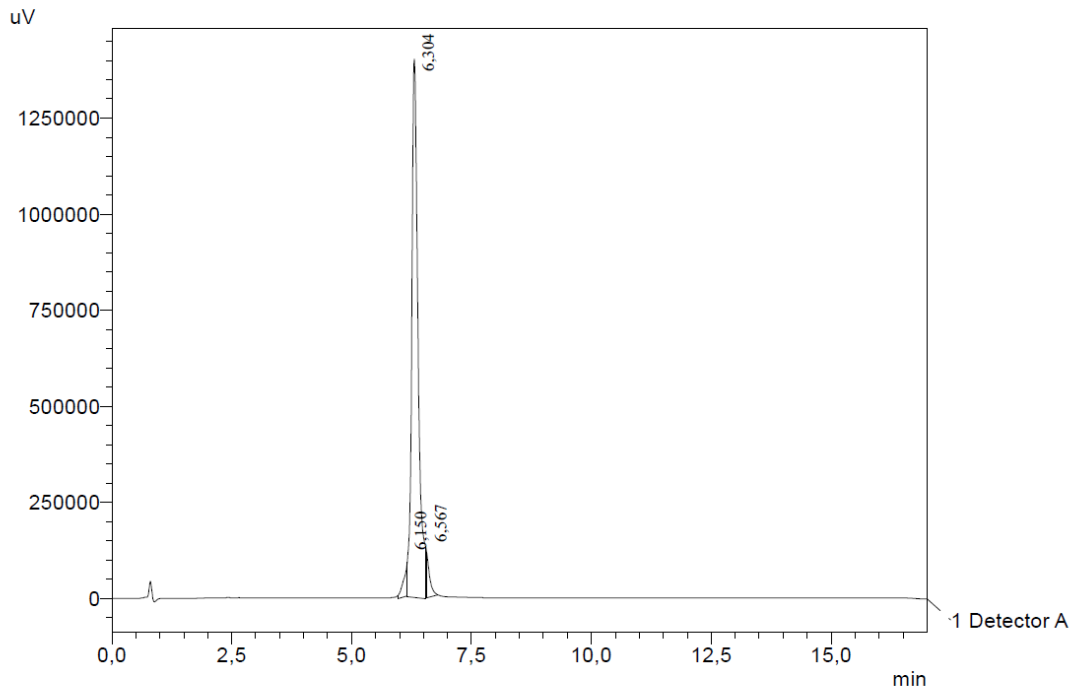

1 Detector A / 220nm

PeakTable

Detector A 220nm

| Peak# | Ret. Time | Area     | Height  | Area %  |
|-------|-----------|----------|---------|---------|
| 1     | 6.150     | 450102   | 77985   | 3.279   |
| 2     | 6.304     | 12819865 | 1402122 | 93.407  |
| 3     | 6.567     | 454800   | 118479  | 3.314   |
| Total |           | 13724767 | 1598586 | 100.000 |

Sample Information

Sample ID: RNase6  
 Tray#: 1  
 Vial#: 31  
 Injection Volume: 10 uL  
 Method Filename: 10a50en15.lcm

Purity: 99 %

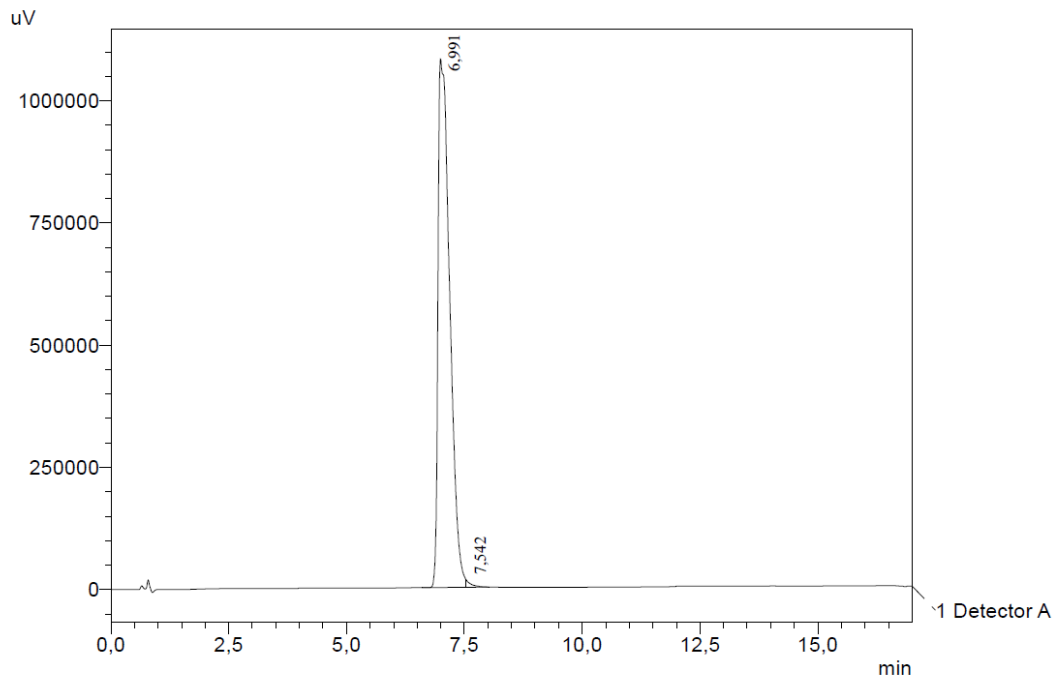

1 Detector A / 220nm

PeakTable

| Peak# | Ret. Time | Area     | Height  | Area %  |
|-------|-----------|----------|---------|---------|
| 1     | 6.991     | 18683708 | 1081656 | 99.457  |
| 2     | 7.542     | 101965   | 14456   | 0.543   |
| Total |           | 18785673 | 1096112 | 100.000 |

Sample Information

Sample ID: RNAse7  
 Tray#: 1  
 Vial#: 31  
 Injection Volume: 15 uL  
 Method Filename: 5a50en15.lcm

Purity: 96 %

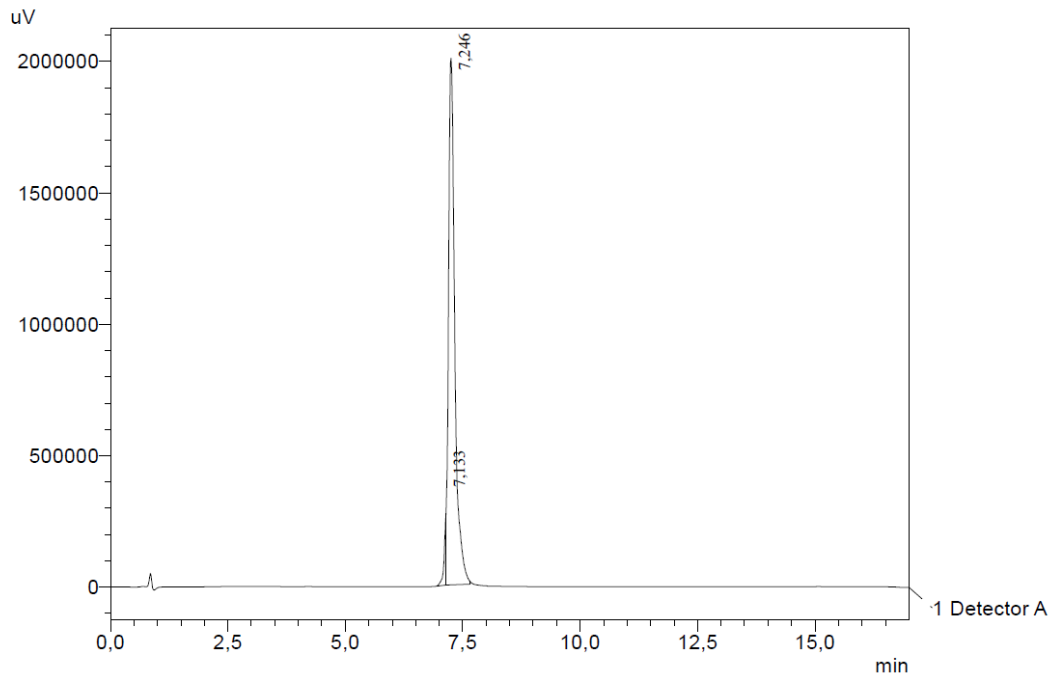

1 Detector A / 220nm

PeakTable

Detector A 220nm

| Peak# | Ret. Time | Area     | Height  | Area %  |
|-------|-----------|----------|---------|---------|
| 1     | 7.133     | 723669   | 239353  | 3.738   |
| 2     | 7.246     | 18635881 | 2005087 | 96.262  |
| Total |           | 19359549 | 2244440 | 100.000 |

Sample Information

Sample ID: 7R  
 Tray#: 1  
 Vial#: 31  
 Injection Volume: 10 uL  
 Method Filename: 5a60en15.lcm

Purity: 90 %

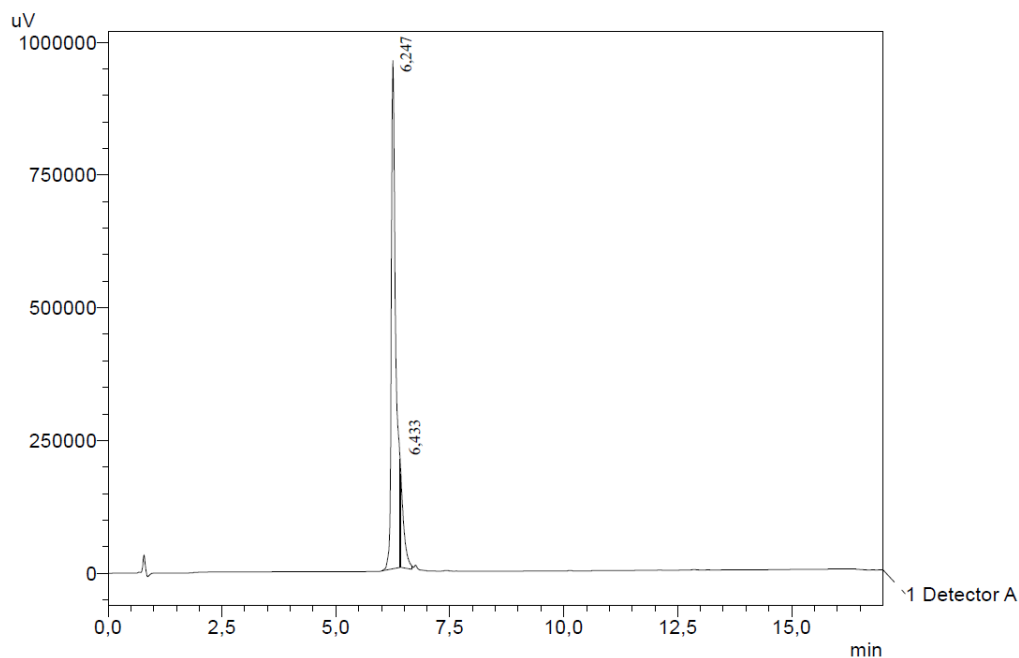

1 Detector A / 220nm

PeakTable

Detector A 220nm

| Peak# | Ret. Time | Area    | Height  | Area %  |
|-------|-----------|---------|---------|---------|
| 1     | 6.247     | 6640126 | 957810  | 90.005  |
| 2     | 6.433     | 737418  | 161063  | 9.995   |
| Total |           | 7377544 | 1118873 | 100.000 |



Sample Information

Sample ID: RNase8  
 Tray#: 1  
 Vial#: 31  
 Injection Volume: 15 uL  
 Method Filename: 10a50en15.lcm

Purity: 91 %

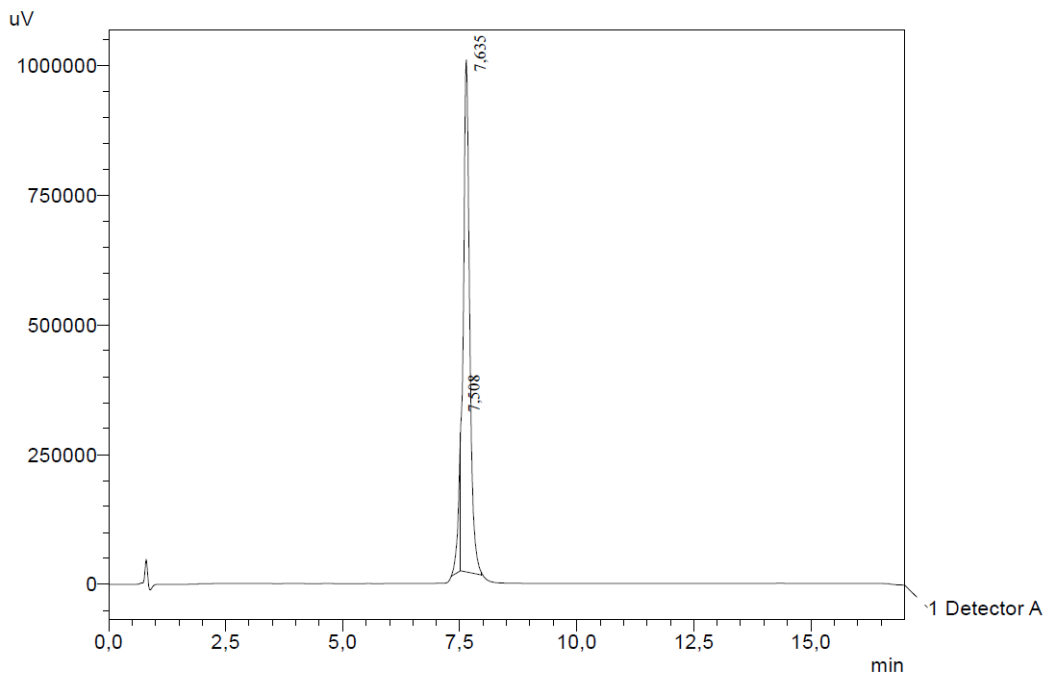

1 Detector A/ 220nm

PeakTable

| Peak# | Ret. Time | Area     | Height  | Area %  |
|-------|-----------|----------|---------|---------|
| 1     | 7,508     | 931358   | 245038  | 9,155   |
| 2     | 7,635     | 9241640  | 987297  | 90,845  |
| Total |           | 10172998 | 1232335 | 100,000 |

**Supplementary Figure S5.** High Performance Liquid Chromatography (HPLC) profiles of purified RN peptides.

RN1

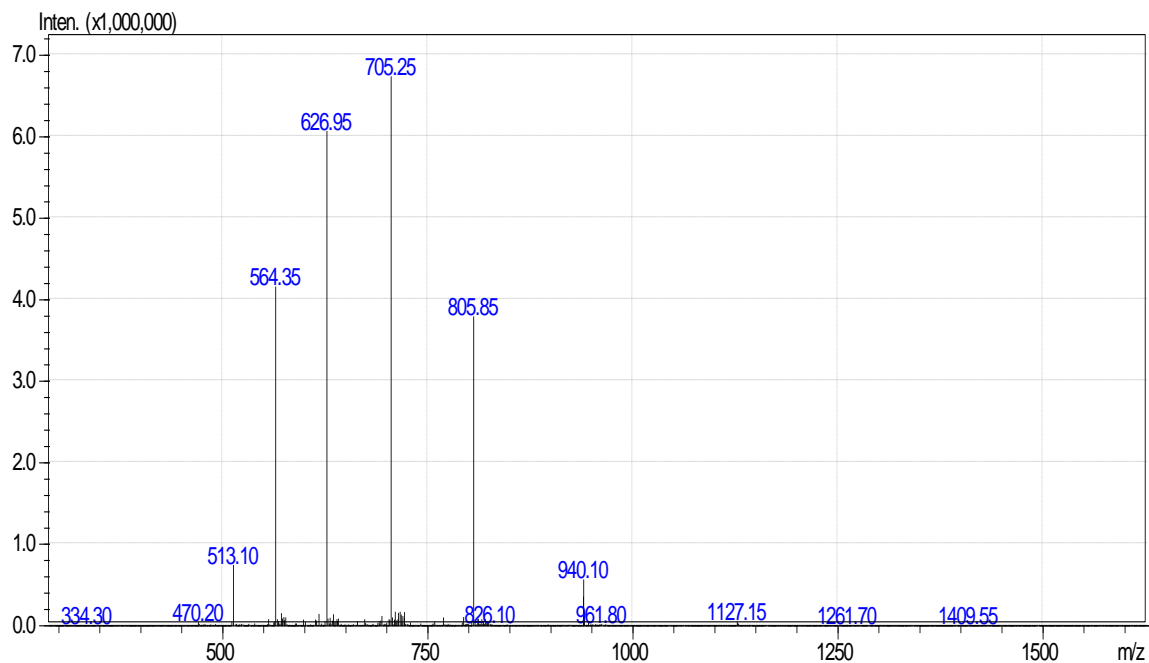

#### Positively charged ion series

| Ch.   | Average   | Monoliso. |
|-------|-----------|-----------|
| MH1+  | 5633.3180 | 5629.7241 |
| MH2+  | 2817.1626 | 2815.3657 |
| MH3+  | 1878.4442 | 1877.2462 |
| MH4+  | 1409.0850 | 1408.1865 |
| MH5+  | 1127.4694 | 1126.7506 |
| MH6+  | 939.7257  | 939.1267  |
| MH7+  | 805.6231  | 805.1097  |
| MH8+  | 705.0461  | 704.5969  |
| MH9+  | 626.8196  | 626.4203  |
| MH10+ | 564.2383  | 563.8790  |
| MH11+ | 513.0355  | 512.7088  |
| MH12+ | 470.3665  | 470.0670  |
| MH13+ | 434.2619  | 433.9855  |
| MH14+ | 403.3152  | 403.0585  |
| MH15+ | 376.4947  | 376.2551  |

RN2

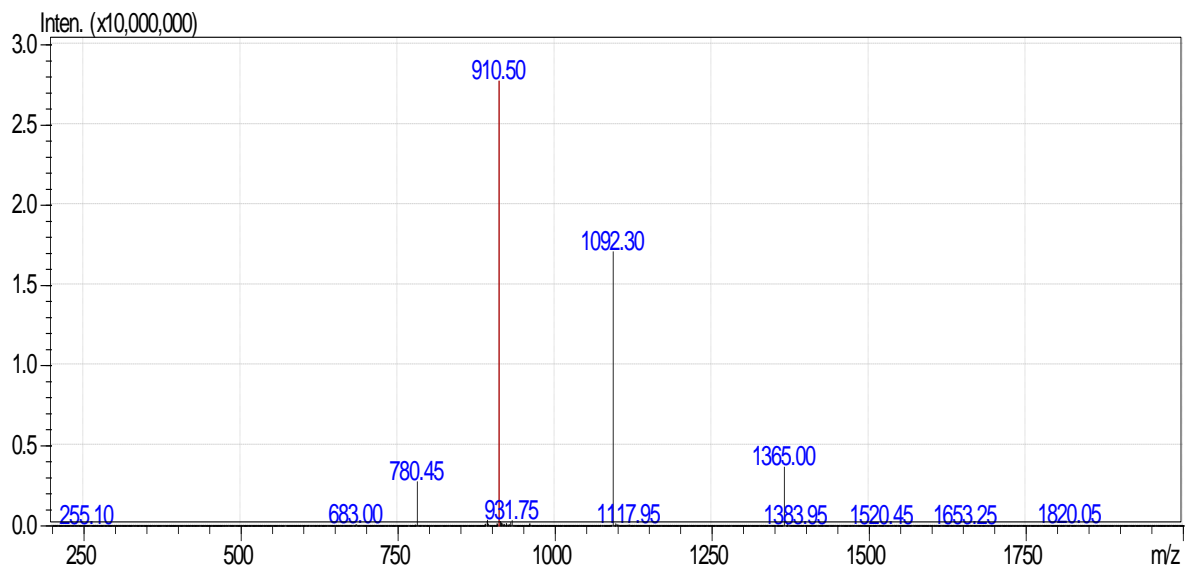

### Positively charged ion series

| Ch.   | Average   | Monolso.  |
|-------|-----------|-----------|
| MH1+  | 5457.1367 | 5453.6807 |
| MH2+  | 2729.0720 | 2727.3440 |
| MH3+  | 1819.7171 | 1818.5651 |
| MH4+  | 1365.0396 | 1364.1756 |
| MH5+  | 1092.2332 | 1091.5420 |
| MH6+  | 910.3622  | 909.7862  |
| MH7+  | 780.4543  | 779.9606  |
| MH8+  | 683.0235  | 682.5915  |
| MH9+  | 607.2439  | 606.8599  |
| MH10+ | 546.6202  | 546.2746  |
| MH11+ | 497.0190  | 496.7049  |
| MH12+ | 455.6847  | 455.3967  |
| MH13+ | 420.7095  | 420.4437  |
| MH14+ | 390.7308  | 390.4840  |
| MH15+ | 364.7492  | 364.5188  |

RN3

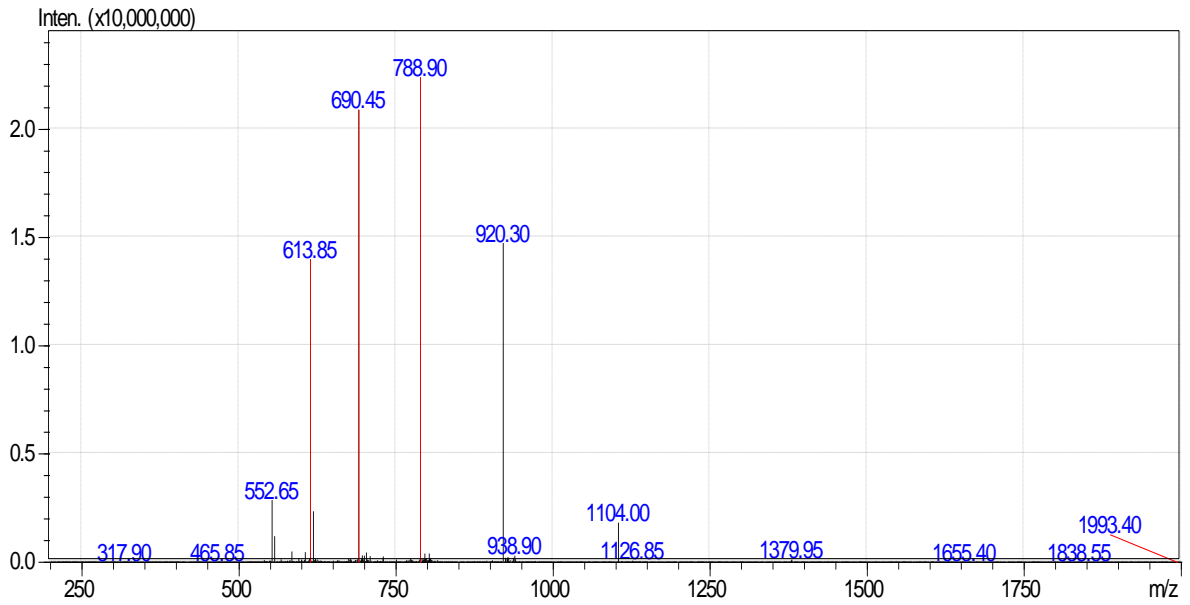

Positively charged ion series

| Ch.   | Average   | Monoliso. |
|-------|-----------|-----------|
| MH1+  | 5516.4596 | 5512.8694 |
| MH2+  | 2758.7334 | 2756.9384 |
| MH3+  | 1839.4914 | 1838.2947 |
| MH4+  | 1379.8704 | 1378.9728 |
| MH5+  | 1104.0977 | 1103.3797 |
| MH6+  | 920.2493  | 919.6510  |
| MH7+  | 788.9290  | 788.4162  |
| MH8+  | 690.4388  | 689.9900  |
| MH9+  | 613.8353  | 613.4364  |
| MH10+ | 552.5525  | 552.1935  |
| MH11+ | 502.4120  | 502.0857  |
| MH12+ | 460.6283  | 460.3291  |
| MH13+ | 425.2728  | 424.9967  |
| MH14+ | 394.9682  | 394.7117  |
| MH15+ | 368.7041  | 368.4648  |

RN3K

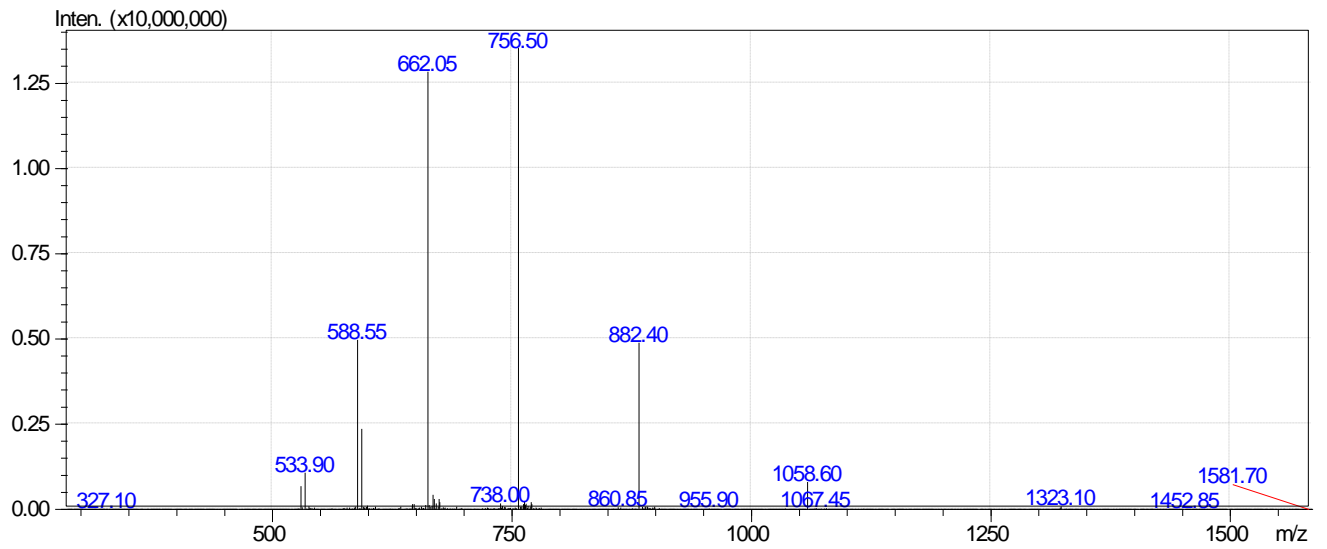

Positively charged ion series

| Ch.   | Average   | Monolso.  |
|-------|-----------|-----------|
| MH1+  | 5288.2326 | 5284.8721 |
| MH2+  | 2644.6199 | 2642.9397 |
| MH3+  | 1763.4157 | 1762.2955 |
| MH4+  | 1322.8136 | 1321.9735 |
| MH5+  | 1058.4523 | 1057.7802 |
| MH6+  | 882.2115  | 881.6514  |
| MH7+  | 756.3252  | 755.8451  |
| MH8+  | 661.9104  | 661.4904  |
| MH9+  | 588.4768  | 588.1034  |
| MH10+ | 529.7298  | 529.3938  |
| MH11+ | 481.6641  | 481.3586  |
| MH12+ | 441.6094  | 441.3293  |
| MH13+ | 407.7169  | 407.4584  |
| MH14+ | 378.6662  | 378.4262  |
| MH15+ | 353.4890  | 353.2649  |

RN4

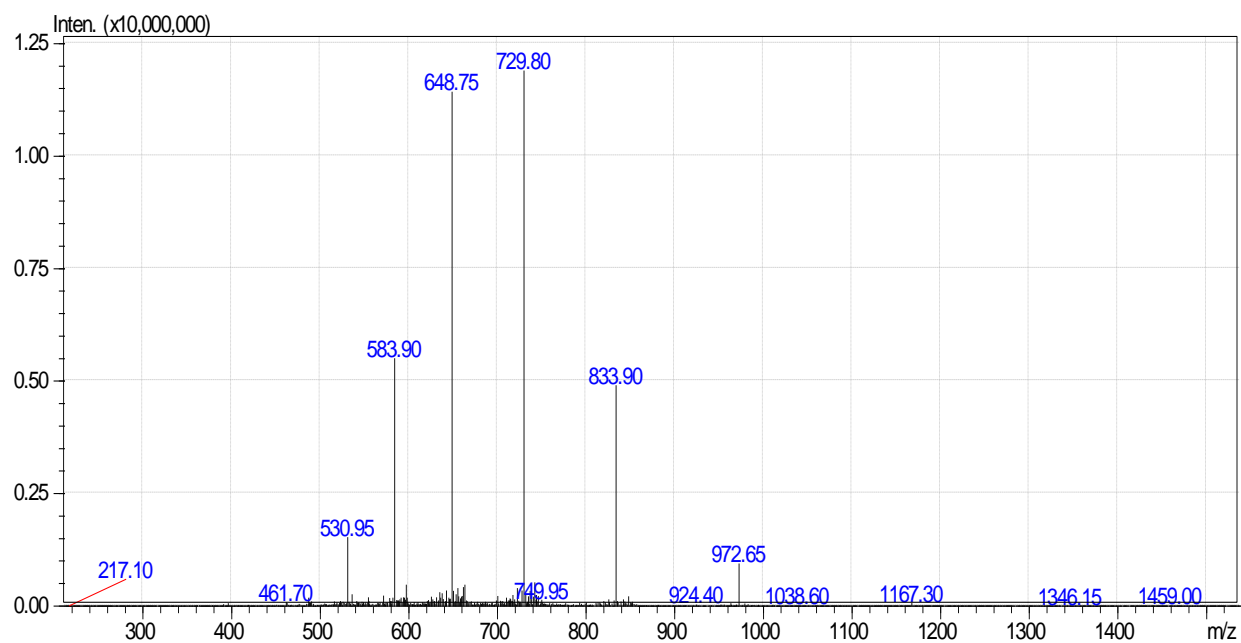

### Positively charged ion series

| Ch.   | Average   | Monoliso. |
|-------|-----------|-----------|
| MH1+  | 5829.6583 | 5825.8434 |
| MH2+  | 2915.3328 | 2913.4254 |
| MH3+  | 1943.8909 | 1942.6193 |
| MH4+  | 1458.1700 | 1457.2163 |
| MH5+  | 1166.7375 | 1165.9745 |
| MH6+  | 972.4491  | 971.8133  |
| MH7+  | 833.6717  | 833.1267  |
| MH8+  | 729.5887  | 729.1118  |
| MH9+  | 648.6352  | 648.2113  |
| MH10+ | 583.8724  | 583.4909  |
| MH11+ | 530.8846  | 530.5378  |
| MH12+ | 486.7282  | 486.4103  |
| MH13+ | 449.3650  | 449.0716  |
| MH14+ | 417.3395  | 417.0670  |
| MH15+ | 389.5840  | 389.3297  |

RN5

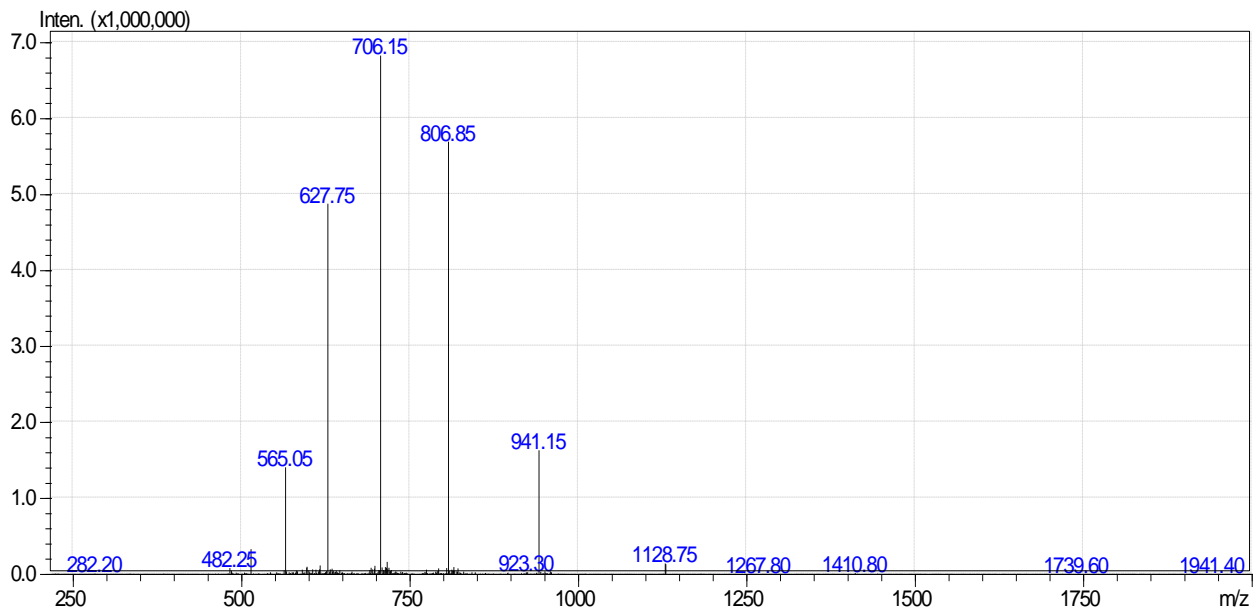

Positively charged ion series

| Ch.   | Average   | MonIso.   |
|-------|-----------|-----------|
| MH1+  | 5640.1965 | 5636.7701 |
| MH2+  | 2820.6019 | 2818.8887 |
| MH3+  | 1880.7370 | 1879.5949 |
| MH4+  | 1410.8046 | 1409.9480 |
| MH5+  | 1128.8451 | 1128.1598 |
| MH6+  | 940.8721  | 940.3011  |
| MH7+  | 806.6057  | 806.1163  |
| MH8+  | 705.9059  | 705.4776  |
| MH9+  | 627.5839  | 627.2031  |
| MH10+ | 564.9262  | 564.5836  |
| MH11+ | 513.6608  | 513.3494  |
| MH12+ | 470.9397  | 470.6542  |
| MH13+ | 434.7911  | 434.5275  |
| MH14+ | 403.8065  | 403.5618  |
| MH15+ | 376.9532  | 376.7248  |

RN6

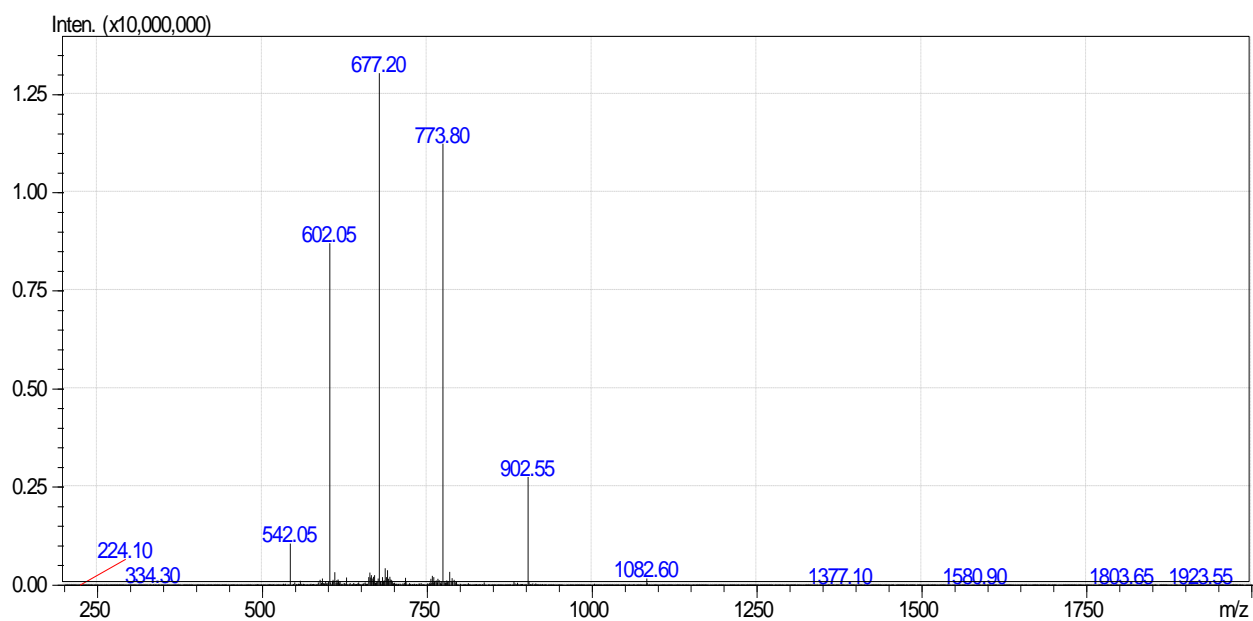

### Positively charged ion series

| Ch.   | Average   | MonIso.   |
|-------|-----------|-----------|
| MH1+  | 5409.1231 | 5405.7515 |
| MH2+  | 2705.0652 | 2703.3794 |
| MH3+  | 1803.7126 | 1802.5887 |
| MH4+  | 1353.0362 | 1352.1933 |
| MH5+  | 1082.6304 | 1081.9561 |
| MH6+  | 902.3599  | 901.7980  |
| MH7+  | 773.5953  | 773.1136  |
| MH8+  | 677.0218  | 676.6003  |
| MH9+  | 601.9090  | 601.5344  |
| MH10+ | 541.8189  | 541.4817  |
| MH11+ | 492.6542  | 492.3477  |
| MH12+ | 451.6836  | 451.4026  |
| MH13+ | 417.0162  | 416.7568  |
| MH14+ | 387.3013  | 387.0604  |
| MH15+ | 361.5483  | 361.3236  |



RN7

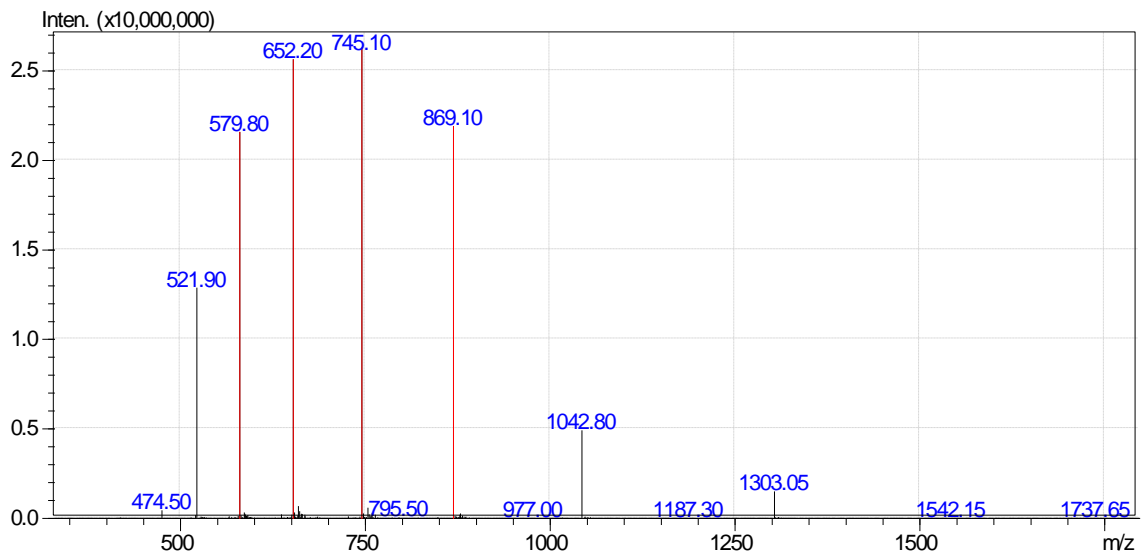

Positively charged ion series

| Ch.   | Average   | Monoliso. |
|-------|-----------|-----------|
| MH1+  | 5210.0377 | 5206.6724 |
| MH2+  | 2605.5225 | 2603.8399 |
| MH3+  | 1737.3507 | 1736.2290 |
| MH4+  | 1303.2649 | 1302.4236 |
| MH5+  | 1042.8134 | 1042.1403 |
| MH6+  | 869.1790  | 868.6181  |
| MH7+  | 745.1545  | 744.6737  |
| MH8+  | 652.1361  | 651.7154  |
| MH9+  | 579.7884  | 579.4145  |
| MH10+ | 521.9103  | 521.5738  |
| MH11+ | 474.5555  | 474.2496  |
| MH12+ | 435.0931  | 434.8127  |
| MH13+ | 401.7019  | 401.4431  |
| MH14+ | 373.0809  | 372.8405  |
| MH15+ | 348.2760  | 348.0516  |

RN7R

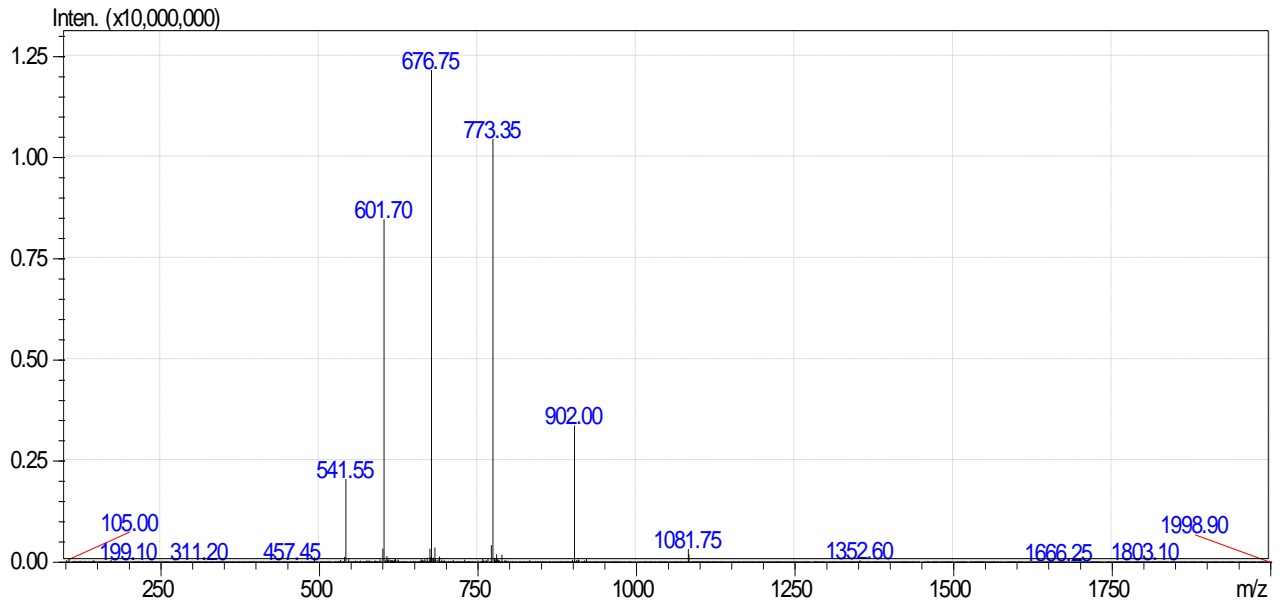

Positively charged ion series

| Ch.   | Average   | Monoliso. |
|-------|-----------|-----------|
| MH1+  | 5406.1315 | 5402.7155 |
| MH2+  | 2703.5694 | 2701.8614 |
| MH3+  | 1802.7153 | 1801.5767 |
| MH4+  | 1352.2883 | 1351.4343 |
| MH5+  | 1082.0321 | 1081.3489 |
| MH6+  | 901.8613  | 901.2920  |
| MH7+  | 773.1679  | 772.6799  |
| MH8+  | 676.6478  | 676.2208  |
| MH9+  | 601.5766  | 601.1971  |
| MH10+ | 541.5197  | 541.1781  |
| MH11+ | 492.3822  | 492.0717  |
| MH12+ | 451.4343  | 451.1496  |
| MH13+ | 416.7861  | 416.5233  |
| MH14+ | 387.0876  | 386.8436  |
| MH15+ | 361.3489  | 361.1212  |

RN8

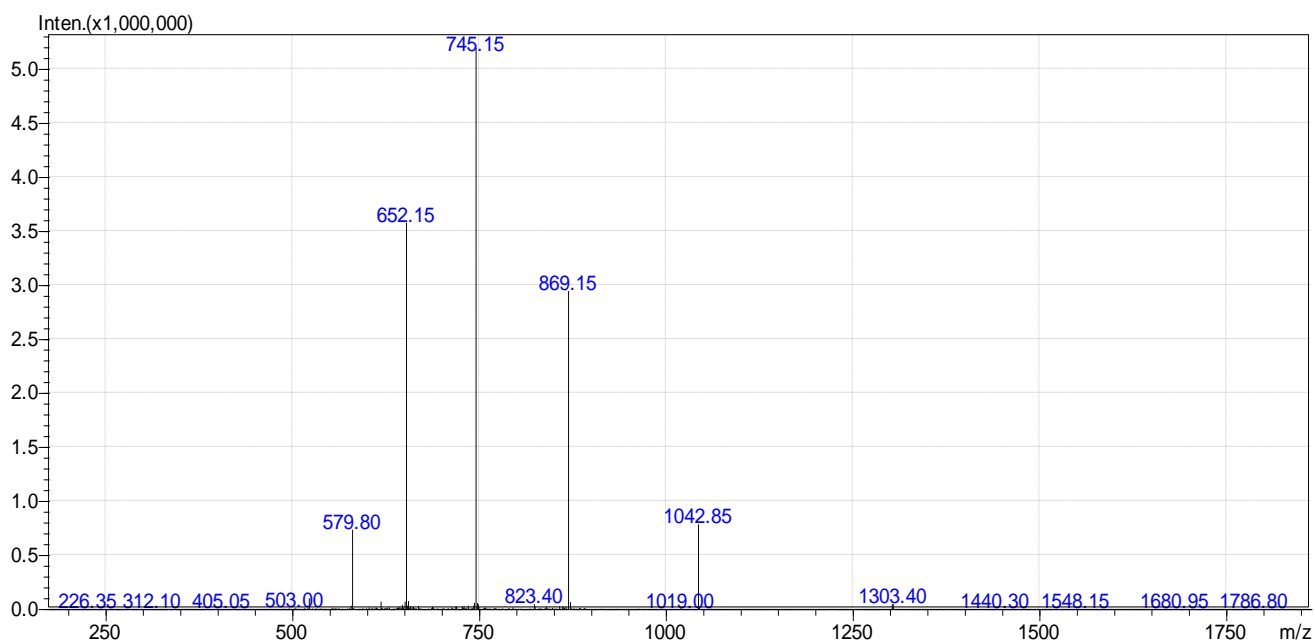

#### Positively charged ion series

| Ch.   | Average   | Monolso.  |
|-------|-----------|-----------|
| MH1+  | 5208.8900 | 5205.5997 |
| MH2+  | 2604.9486 | 2603.3035 |
| MH3+  | 1736.9682 | 1735.8714 |
| MH4+  | 1302.9780 | 1302.1554 |
| MH5+  | 1042.5838 | 1041.9258 |
| MH6+  | 868.9877  | 868.4393  |
| MH7+  | 744.9905  | 744.5205  |
| MH8+  | 651.9926  | 651.5813  |
| MH9+  | 579.6609  | 579.2953  |
| MH10+ | 521.7955  | 521.4665  |
| MH11+ | 474.4512  | 474.1520  |
| MH12+ | 434.9975  | 434.7233  |
| MH13+ | 401.6136  | 401.3605  |
| MH14+ | 372.9989  | 372.7639  |
| MH15+ | 348.1995  | 347.9801  |

**Supplementary Figure S6.** Liquid chromatography- Mass Spectrometry (LCMS) spectra of purified RN peptides.

## References

1. Naglik, J.R.; Fostira, F.; Ruprai, J.; Staab, J.F.; Challacombe, S.J.; Sundstrom, P. *Candida albicans* HWP1 gene expression and host antibody responses in colonization and disease. *J. Med. Microbiol.* **2006**, *55*, 1323–1327.
2. Morici, P.; Fais, R.; Rizzato, C.; Tavanti, A.; Lupetti, A. Inhibition of *Candida albicans* biofilm formation by the synthetic lactoferricin derived peptide hLF1-11. *PLoS One* **2016**, *11*, 1–15.
3. Liu, T.T.; Lee, R.E.B.; Barker, K.S.; Lee, R.E.; Wei, L.; Homayouni, R.; Rogers, P.D. Genome-wide expression profiling of the response to azole, polyene, echinocandin, and pyrimidine antifungal agents in *Candida albicans*. *Antimicrob. Agents Chemother.* **2005**, *49*, 2226–2236.
4. Nailis, H.; Coenye, T.; Van Nieuwerburgh, F.; Deforce, D.; Nelis, H.J. Development and evaluation of different normalization strategies for gene expression studies in *Candida albicans* biofilms by real-time PCR. *BMC Mol. Biol.* **2006**, *7*, 1–9.
5. Tsai, P.W.; Cheng, Y.L.; Hsieh, W.P.; Lan, C.Y. Responses of *Candida albicans* to the human antimicrobial peptide LL-37. *J. Microbiol.* **2014**, *52*, 581–589.
6. Gautier, R.; Douguet, D.; Antony, B.; Drin, G. HELIQUEST: a web server to screen sequences with specific  $\alpha$ -helical properties. *Bioinformatics* **2008**, *24*, 2101–2102.
7. García-Mayoral, M.F.; Moussaoui, M.; de la Torre, B.G.; Andreu, D.; Boix, E.; Nogués, M.V.; Rico, M.; Laurents, D. V; Bruix, M. NMR structural determinants of eosinophil cationic protein binding to membrane and heparin mimetics. *Biophys. J.* **2010**, *98*, 2702–11.
